# Supplementary material for: Molecular structure and infrared spectra of dimethyl fumarateElectronic supplementary information (ESI) available: Definition of internal symmetry coordinates, calculated frequencies, IR intensities, Raman activities, potential energy distributions and optimized conformers I, II and III. See http://www.rsc.org/suppdata/cp/b2/b203246p/
Source: Royal Society of Chemistry journal article supplement (doi:10.1039/b203246p), 2002-07-15
Supplement: table_s2.doc [file table_s2.doc]

Table S2

Calculated (DFT/B3LYP/6-31G**) frequencies (/ cm-1), IR intensities (IIR/ km mol-1), Raman activities (IRaman/ Å4 a.m.u.-1) and Potential Energy Distributions (PED) for conformer **I** of DMFU.

| Approximate  description | Calculated |  |  |  |
| --- | --- | --- | --- | --- |
|  |  | IIR | IRaman | PED |
| C-H asym | 3222.2 | 0.1 | 0.0 | C-H asym (100) |
| C-H sym | 3219.7 | 0.0 | 84.5 | C-H sym (99) |
| CH3 asym (1) | 3178.0 | 0.0 | 163.1 | CH3 asym (1)(98) |
| CH3 asym (2) | 3177.9 | 32.4 | 0.0 | CH3 asym (2)(98) |
| CH3 asym’ (1) | 3142.3 | 36.3 | 0.0 | CH3 asym’ (1)(100) |
| CH3 asym’ (2) | 3142.3 | 0.0 | 108.0 | CH3 asym’ (2)(100) |
| CH3 sym (1) | 3065.3 | 0.0 | 284.1 | CH3 sym (1)(98) |
| CH3 sym (2) | 3065.1 | 59.6 | 0.0 | CH3 sym (2)(98) |
| C=O sym | 1809.6 | 0.0 | 50.3 | C=O sym (84) |
| C=O asym | 1801.2 | 350.0 | 0.0 | C=O asym (88) |
| C=C | 1726.6 | 0.0 | 382.3 | C=C (69), CH sym (14), C-C sym (12) |
| CH3 asym (2) | 1508.1 | 13.2 | 0.0 | CH3 asym (2)(78), CH3 sym (2)(12) |
| CH3 asym (1) | 1508.0 | 0.0 | 30.5 | CH3 asym (1)(80) |
| CH3 asym’ (1) | 1495.4 | 13.0 | 0.0 | CH3 asym’ (1)(94) |
| CH3 asym’ (2) | 1495.4 | 0.0 | 46.5 | CH3 asym’ (2)(94) |
| CH3 sym (2) | 1481.7 | 40.8 | 0.0 | CH3 sym (2)(82) |
| CH3 sym (1) | 1479.7 | 0.0 | 4.5 | CH3 sym (1)(85) |
| CH sym | 1339.0 | 0.0 | 12.6 | CH sym (46), C=C (17), C-O sym (15) |
| C-C asym | 1334.7 | 881.8 | 0.0 | CH asym (33), C-C asym (24), C-O asym (22), C=O asym (12) |
| C-O sym | 1248.2 | 0.0 | 57.0 | C-O sym (41), CH sym (21) |
| CH3 asym | 1216.6 | 92.7 | 0.0 | CH3 asym (71) |
| CH3 sym | 1208.1 | 0.0 | 20.7 | CH3 sym (67) |
| CH asym | 1183.5 | 322.6 | 0.0 | CH asym (51), C-O asym (19) |
| CH3’ sym | 1178.4 | 1.7 | 0.0 | CH3’ sym (92) |
| CH3’ asym | 1178.3 | 0.0 | 10.0 | CH3’ asym (92) |
| C-O(CH3) asym | 1052.6 | 57.3 | 0.0 | C-O(CH3) asym (65), C-C asym (22) |
| C-H sym | 1030.6 | 31.9 | 0.0 | C-H sym (106) |
| C-O(CH3) sym | 1026.8 | 0.0 | 20.1 | C-O(CH3) sym (69), C-C sym (21) |
| C-C sym | 980.7 | 0.0 | 6.7 | CC=C sym (22), C-O(CH3) sym (20), C-C sym (17), C-O sym(11) |
| C-H asym | 920.0 | 0.0 | 13.6 | C-H asym (83), C=O asym (19) |
| C-O asym | 907.5 | 19.5 | 0.0 | C-O asym (36), C-C asym (21), C-O(CH3) asym (18) |
| C=O sym | 777.3 | 28.5 | 0.0 | C=O sym (88), C=C (15) |
| C=O sym | 760.9 | 0.0 | 11.4 | C=O sym (38), C-O sym (21), CC=C sym (15), COC sym (14) |
| C=O asym | 680.7 | 20.9 | 0.0 | C=O asym (52), C-C asym (23), COC asym (14) |
| C=O asym | 653.5 | 0.0 | 0.2 | C=O asym (84), C-H asym (20) |
| CCO asym | 526.5 | 9.7 | 0.0 | CCO asym (49), CC=C asym (18), C=O asym (13) |
| COC sym | 370.9 | 0.0 | 1.3 | COC sym (43), C=O sym (24), CCO sym (18) |
| COC asym | 311.1 | 42.2 | 0.0 | COC asym (66), C=O asym (16) |
| CC=C sym | 278.1 | 0.0 | 3.0 | C-C sym (28), CC=C sym (26), CCO sym (18), C=O sym (14) |
| C-O sym | 246.5 | 15.3 | 0.0 | C-O sym (61), C=C (35) |
| CCO sym | 225.1 | 0.0 | 1.2 | CCO sym (43), COC sym (30), CC=C sym (20) |
| C-O asym | 221.8 | 0.0 | 3.6 | C-O asym (57), C-C asym (41) |
| CH3 sym | 123.1 | 0.2 | 0.0 | CH3 sym(85) |
| CH3 asym | 119.1 | 0.0 | 1.5 | CH3 asym (95) |
| C-C asym | 105.8 | 0.0 | 1.1 | C-C asym (59), C-O asym (44) |
| C=C | 91.4 | 0.0 | 0.0 | C=C (46), C-O sym (34), CH3 sym (12) |
| CC=C asym | 89.4 | 2.0 | 0.0 | CC=C asym (68), CCO asym (25) |
| C-C sym | 42.1 | 4.4 | 0.0 | C-C sym (94) |
