# Supplementary material for: Molecular structure and infrared spectra of dimethyl fumarateElectronic supplementary information (ESI) available: Definition of internal symmetry coordinates, calculated frequencies, IR intensities, Raman activities, potential energy distributions and optimized conformers I, II and III. See http://www.rsc.org/suppdata/cp/b2/b203246p/
Source: Royal Society of Chemistry journal article supplement (doi:10.1039/b203246p), 2002-07-15
Supplement: table_s3.doc [file table_s3.doc]

Table S3

Calculated (DFT/B3LYP/6-31G**) frequencies (/ cm-1), IR intensities (IIR/ km mol-1)and Potential Energy Distributions (PED) for conformer **II** of DMFU.

| Approximate  description | Calculated |  |  |
| --- | --- | --- | --- |
|  |  | IIR | PED |
| C-H asym | 3231.4 | 0.2 | C-H asym (70), C-H sym (30) |
| C-H sym | 3221.3 | 0.3 | C-H sym (69), C-H asym (30) |
| CH3 asym (1) | 3177.9 | 18.9 | CH3 asym (1)(52), CH3 asym (2)(46) |
| CH3 asym (2) | 3176.8 | 11.6 | CH3 asym (2)(52), CH3 asym(1)(46) |
| CH3 asym’ (1) | 3143.3 | 19.9 | CH3 asym’ (1)(51), CH3 asym’ (2)(49) |
| CH3 asym’ (2) | 3142.4 | 18.7 | CH3 asym’ (2)(51), CH3 asym’ (1)(49) |
| CH3 sym (1) | 3065.7 | 38.5 | CH3 sym (1)(70), CH3 sym (2)(28) |
| CH3 sym (2) | 3065.4 | 22.9 | CH3 sym (2)(70), CH3 sym (1)(28) |
| C=O asym | 1812.1 | 66.1 | C=O asym (80) |
| C=O sym | 1803.7 | 327.1 | C=O sym (87) |
| C=C | 1713.8 | 31.2 | C=C (68), CH sym (13) |
| CH3 asym (2) | 1509.8 | 7.5 | CH3 asym (2)(39), CH3 asym (1)(39) |
| CH3 asym (1) | 1507.8 | 8.3 | CH3 asym (1)(41), CH3 asym (2)(40) |
| CH3 asym’ (1) | 1495.8 | 6.6 | CH3 asym’ (1)(47), CH3 asym’ (2)(47) |
| CH3 asym’ (2) | 1494.9 | 6.3 | CH3 asym’(2)(47), CH3 asym’ (1)(47) |
| CH3 sym (2) | 1482.8 | 25.2 | CH3 sym (2)(63), CH3 sym (1)(19) |
| CH3 sym (1) | 1480.4 | 7.2 | CH3 sym (1)(65), CH3 sym (2)(20) |
| C-O sym | 1341.1 | 169.0 | CH sym (29), C-O sym (14), C=C (12), CH asym (12) |
| C-C asym | 1306.4 | 493.6 | C-O asym (22), C-C asym (16), C-O sym (15), CH sym (11) |
| CH sym | 1290.7 | 228.7 | CH sym (30), CH asym (27) |
| CH3 asym | 1221.3 | 92.8 | CH3 asym (44), CH asym (15) |
| CH3 sym | 1212.1 | 10.3 | CH3 sym (65), CH3 asym (12) |
| CH asym | 1199.2 | 89.0 | CH asym (34), CH3 asym (21) |
| CH3’ asym | 1178.9 | 0.8 | CH3’ asym (53), CH3’ sym (40) |
| CH3’ sym | 1178.3 | 0.8 | CH3’ sym (53), CH3’ asym (40) |
| C-O(CH3) asym | 1073.7 | 114.3 | C-O(CH3) asym (55), C-O(CH3) sym (20) |
| C-O(CH3) sym | 1041.3 | 9.4 | C-O(CH3) sym (45), C-O(CH3) asym (19), C-C asym (12), C-C sym (11) |
| C-H sym | 1033.6 | 31.1 | C-H sym (105) |
| C-C sym | 943.7 | 11.0 | C-O(CH3) sym (18), C-O sym (15), C-C asym (14), C-C sym (11) |
| C-H asym | 916.9 | 0.5 | C-H asym (83), C=O sym (21) |
| C-O asym | 876.2 | 8.1 | C-O asym (28), C-O sym (15), C-O(CH3) asym (11) |
| C=O asym | 776.9 | 27.6 | C=O asym (89), C=C (16) |
| C=O sym | 758.3 | 1.7 | C=O sym (29), CC=C sym (19), COC sym (12) |
| C=O asym | 673.1 | 16.3 | C=O asym (41),C-C asym (23) COC asym (14) |
| C=O sym | 643.6 | 0.1 | C=O sym (80), C-H asym (21) |
| CCO sym | 534.0 | 2.5 | CCO sym (40), C=O sym (25), CC=C asym (17) |
| COC asym | 381.7 | 21.2 | C=O asym (29), COC asym (24), CCO asym (20) |
| COC sym | 314.1 | 17.6 | COC sym (65) |
| CC=C sym | 298.0 | 8.6 | COC asym (27), C-C sym (18), CC=C sym (15), C=O sym (11) |
| C-O asym | 238.5 | 14.5 | C-O asym (57), C=C (35) |
| CCO asym | 208.5 | 0.02 | CCO asym (43), CC=C sym (26), COC asym (18) |
| C-O sym | 207.3 | 0.9 | C-O sym (61), C-C asym (34) |
| CH3 sym | 130.7 | 0.2 | CH3 sym (43), CH3 asym (39), C-C asym (12) |
| CH3 asym | 116.0 | 0.02 | CH3 sym (48), CH3 asym (46) |
| C-C asym | 101.3 | 0.1 | C-C asym (52), C-O sym (33), CH3 asym (12) |
| CC=C asym | 91.5 | 0.2 | CC=C asym (68), CCO sym (25) |
| C=C | 82.3 | 0.4 | C=C (49), C-O asym (40) |
| C-C sym | 40.4 | 0.03 | C-C sym (103) |
