# Supplementary material for: Molecular structure and infrared spectra of dimethyl fumarateElectronic supplementary information (ESI) available: Definition of internal symmetry coordinates, calculated frequencies, IR intensities, Raman activities, potential energy distributions and optimized conformers I, II and III. See http://www.rsc.org/suppdata/cp/b2/b203246p/
Source: Royal Society of Chemistry journal article supplement (doi:10.1039/b203246p), 2002-07-15
Supplement: table_s4.doc [file table_s4.doc]

Table S4

Calculated (DFT/B3LYP/6-31G**) frequencies (/ cm-1), IR intensities (IIR/ km mol-1) and Potential Energy Distributions (PED) for conformer **III** of DMFU.

| Approximate  description | Calculated |  |  |
| --- | --- | --- | --- |
|  |  | IIR | PED |
| C-H asym | 3236.6 | 0.3 | C-H asym (100) |
| C-H sym | 3231.1 | 0.0 | C-H sym (99) |
| CH3 asym (1) | 3177.7 | 0.0 | CH3 asym (1)(98) |
| CH3 asym (2) | 3177.7 | 25.8 | CH3 asym (2)(98) |
| CH3 asym’ (2) | 3143.6 | 38.9 | CH3 asym’ (2)(100) |
| CH3 asym’ (1) | 3143.6 | 0.0 | CH3 asym’ (1)(100) |
| CH3 sym (1) | 3066.0 | 0.0 | CH3 sym (1)(98) |
| CH3 sym (2) | 3065.9 | 55.6 | CH3 sym (2)(98) |
| C=O sym | 1809.9 | 0.0 | C=O sym (77) |
| C=O asym | 1804.1 | 475.3 | C=O asym (87) |
| C=C | 1703.0 | 0.0 | C=C (68), C=O sym (12), CH sym (12) |
| CH3 asym (1) | 1509.8 | 0.0 | CH3 asym (1)(20), CH3 sym (1)(11) |
| CH3 asym (2) | 1509.7 | 13.7 | CH3 asym (2)(79), CH3 sym (2)(12) |
| CH3 asym’ (1) | 1495.7 | 0.0 | CH3 asym’ (1)(94) |
| CH3 asym’ (2) | 1495.6 | 12.8 | CH3 asym’ (2)(94) |
| CH3 sym (1) | 1482.4 | 0.0 | CH3 sym (1)(82) |
| CH3 sym (2) | 1482.0 | 28.0 | CH3 sym (2)(83) |
| C-O sym | 1334.9 | 0.0 | C-O sym (33), C-C sym (23), C=O sym (19), CC=C sym (13) |
| CH sym | 1314.7 | 0.0 | CH sym (76), C=C (13) |
| C-C asym | 1290.1 | 721.6 | C-O asym (36), CH asym (21), C-C asym (19), C=O asym (15) |
| CH asym | 1255.6 | 218.8 | CH asym (64), C-C asym (15) |
| CH3 sym | 1212.4 | 0.0 | CH3 sym (78) |
| CH3 asym | 1210.1 | 36.0 | CH3 asym (73) |
| CH3’ asym | 1178.8 | 0.0 | CH3’ asym (93) |
| CH3’ sym | 1178.7 | 1.4 | CH3’ sym (93) |
| C-O(CH3) sym | 1077.7 | 0.0 | C-O(CH3) sym (74) |
| C-O(CH3) asym | 1068.7 | 119.3 | C-O(CH3) asym (74), C-C asym (19) |
| C-H sym | 1035.0 | 31.3 | C-H sym (106) |
| C-H asym | 916.4 | 0.0 | C-H asym (85), C=O asym (24) |
| C-O asym | 891.2 | 21.6 | C-O asym (38), C-C asym (18), C-O(CH3) asym (15) |
| C-C sym | 869.5 | 0.0 | C-O sym (46), C-O(CH3) sym (14), C-C sym (11) |
| C=O sym | 777.6 | 26.6 | C=O sym (90), C=C (17) |
| CC=C sym | 754.6 | 0.0 | CC=C sym (28), C=O sym (20), CCO sym (19), COC sym (12) |
| C=O asym | 676.7 | 17.6 | C=O asym (47), C-C asym (24), COC asym (14) |
| C=O asym | 634.7 | 0.0 | C=O asym (76), C-H asym (21) |
| CCO asym | 525.2 | 10.3 | CCO asym (48), CC=C asym (17), C=O asym (15) |
| C=O sym | 408.7 | 0.0 | C=O sym (52), C-C sym (19), CCO sym (13) |
| COC sym | 315.7 | 0.0 | COC sym (62), CC=C sym (15), C-C sym (15) |
| COC asym | 308.9 | 35.5 | COC asym (65), C=O asym (16) |
| C-O sym | 228.3 | 15.1 | C-O sym (57), C=C (39) |
| C-O asym | 196.3 | 0.0 | C-O asym (72), C-C asym (33) |
| CCO sym | 189.2 | 0.0 | CCO sym (53), CC=C sym (27) |
| CH3 asym | 131.0 | 0.0 | CH3 asym (77), C-C asym (20) |
| CH3 sym | 124.9 | 0.2 | CH3 sym (95) |
| CC=C asym | 99.5 | 0.0 | CC=C asym (69), CCO asym (23) |
| C-C asym | 99.5 | 2.0 | C-C asym (52), C-O asym (28), CH3 asym(21) |
| C=C | 78.5 | 0.5 | C=C (57),C-O sym (45) |
| C-C sym | 40.8 | 3.9 | C-C sym (109) |
